# The Host Defense Proteome of Human and Bovine Milk

Kasper Hettinga<sup>1\*</sup>, Hein van Valenberg<sup>1</sup>, Sacco de Vries<sup>2</sup>, Sjef Boeren<sup>2</sup>, Toon van Hooijdonk<sup>1,3</sup>, Johan van Arendonk<sup>4</sup>, Jacques Vervoort<sup>2</sup>

**1** Dairy Science and Technology Group, Wageningen University, Wageningen, The Netherlands, **2** Laboratory of Biochemistry, Wageningen University, Wageningen, The Netherlands, **3** FrieslandCampina, Amersfoort, The Netherlands, **4** Animal Breeding and Genomics Centre, Wageningen University, Wageningen, The Netherlands

## Abstract

Milk is the single source of nutrients for the newborn mammal. The composition of milk of different mammals has been adapted during evolution of the species to fulfill the needs of the offspring. Milk not only provides nutrients, but it also serves as a medium for transfer of host defense components to the offspring. The host defense proteins in the milk of different mammalian species are expected to reveal signatures of evolution. The aim of this study is therefore to study the difference in the host defense proteome of human and bovine milk. We analyzed human and bovine milk using a shot-gun proteomics approach focusing on host defense-related proteins. In total, 268 proteins in human milk and 269 proteins in bovine milk were identified. Of these, 44 from human milk and 51 from bovine milk are related to the host defense system. Of these proteins, 33 were found in both species but with significantly different quantities. High concentrations of proteins involved in the mucosal immune system, immunoglobulin A, CD14, lactoferrin, and lysozyme, were present in human milk. The human newborn is known to be deficient for at least two of these proteins (immunoglobulin A and CD14). On the other hand, antimicrobial proteins (5 cathelicidins and lactoperoxidase) were abundant in bovine milk. The high concentration of lactoperoxidase is probably linked to the high amount of thiocyanate in the plant-based diet of cows. This first detailed analysis of host defense proteins in human and bovine milk is an important step in understanding the function of milk in the development of the immune system of these two mammals.

**Citation:** Hettinga K, van Valenberg H, de Vries S, Boeren S, van Hooijdonk T, et al. (2011) The Host Defense Proteome of Human and Bovine Milk. PLoS ONE 6(4): e19433. doi:10.1371/journal.pone.0019433

**Editor:** Vladimir N. Uversky, University of South Florida College of Medicine, United States of America

**Received:** February 5, 2011; **Accepted:** March 29, 2011; **Published:** April 27, 2011

**Copyright:** © 2011 Hettinga et al. This is an open-access article distributed under the terms of the Creative Commons Attribution License, which permits unrestricted use, distribution, and reproduction in any medium, provided the original author and source are credited.

**Funding:** Funding support was provided by the Dutch Dairy Association. The funders had no role in study design, data collection and analysis, decision to publish, or preparation of the manuscript.

**Competing Interests:** The authors have read the journal's policy and have the following conflict to declare: TvH is an employee of FrieslandCampina, a dairy company that develops and markets dairy products. This did not alter the authors' adherence to all the PLoS ONE policies on sharing data and materials.

\* E-mail: kasper.hettinga@wur.nl

## Introduction

Milk is the single source of nutrients for the newborn mammal. The composition of milk of different mammals has been adapted during evolution of the species to fulfill the needs of the offspring. Milk not only provides nutrients, but it also serves as a medium for transfer of host defense components to the offspring. The host defense proteins in the milk of different mammalian species is expected to reveal signatures of evolution. Proteins are a major contributor to host defense components in milk [1,2]. In humans, a positive relation between breastfeeding and health of babies has been noted from the time of the first recorded use of human-milk substitutes, going back thousands of years [3].

Because bovine milk is used as a substitute for human milk, it is important to know the differences in host defense proteins between human and bovine milk. Despite the description of several differences between human and bovine milk, there is limited knowledge on differences in the host defense proteome. A recent overview compared the human and bovine milk proteome [4]. Data were collected, however, from studies using various types of samples and analytical techniques. Data on the presence of cytokines and hormones, for example, were available only for human milk and not for bovine milk. As a result, we now only have limited knowledge on differences in host defense proteome between human and bovine milk.

To study the milk proteome, milk is usually separated into three protein fractions: caseins, serum, and milk fat globule membrane (MFGM) [5,6]. As a start, the whole milk is separated in cream and skim milk. The cream contains the milk fat, which is present in globules. These globules consist of a triglyceride core surrounded by the MFGM, derived from the apical membrane of the milk-producing epithelial cells [7]. The protein component of the MFGM (about 1–4% of total milk protein) can be isolated from the cream. The skim milk can be centrifuged to obtain a casein pellet and a supernatant containing the serum proteins. The MFGM and serum protein fractions, which contain the low-abundance proteins from milk, can then be used for proteomic analyses.

In this study, we compared the proteomes of serum and MFGM from human and bovine milk, with the aim to determine differences in host defense proteomes. The overlap as well as the difference we found in the host defense proteomes increases our understanding of human and bovine milk. This knowledge will help to identify the proteins responsible for immunity-promoting properties of milk for the offspring.

## Results and Discussion

We identified a total of 268 proteins in human milk and 269 proteins in bovine milk, of which 147 proteins were found in both species (Table 1). We identified a larger number of proteins in milk

then has been published previously. Most studies used excision of spots on 2D-gels, followed by mass-spectrometry e.g. [5,8,9]. With this 2D-gel method only excised spots are analyzed. With our 1D-gel method, however, we analyzed the whole gel lane and did, thus, not rely on visible protein staining. In addition, our 1D-gel method is more suitable for analyzing membrane proteins, which are ubiquitous in MFGM [10]. The same 1D-gel method, was recently used for studying the proteome of bovine milk serum [11] and bovine MFGM [12].

In bovine serum, we identified a total of 192 proteins. Previously, 148 proteins were identified in bovine milk serum [11]; 132 of these were also identified here. In bovine MFGM, we identified 232 proteins while in a previous study only 116 proteins were identified [12]; 95 of these were also identified here. Both comparisons show that our approach enabled us not only to identify about 90% of the already reported proteins but also to nearly double the number of identified proteins. Many of the newly identified proteins in our study were enzymes, that usually occur at low concentration. This suggest that the increase in number of identified proteins can be explained by the higher sensitivity of our method compared with previous methods.

The identified proteins were categorized according to their GO annotation (Table 2). Of all the proteins annotated, 44 proteins in human milk and 51 proteins in bovine milk were related to a host defense function. Although the total number of host defense proteins was similar in both milk samples, the predicted function of the individual proteins differed between species. Bovine milk, for example, contained a wider range of antibacterial proteins, whereas human milk contained a wider range of immunoglobulins.

So far, we have reported qualitative differences in the proteome of human and bovine milk. For a better understanding of the biological differences between milk of these species, we also performed a quantitative analysis of the host defense proteome. For quantification, a filter-based sample preparation method was used, as this allows a more reproducible quantification compared to gel-based methods. The relative protein concentrations of host defense proteins in human and in bovine milk is shown in Table 3. Some host defense proteins were detected only with the qualitative (gel-based) method and not with the quantitative (filter-based) method (Table 3). The failure to detect certain proteins with the quantitative method is caused by its lower sensitivity compared with the qualitative method.

Immunoglobulins are the most abundant group of host defense proteins in human milk serum. A wider range as well as a larger amount of immunoglobulins was identified in the serum fraction of human milk compared with bovine milk (Table 3). Bovine colostrum was found to contain similar amounts of immunoglobulins as human colostrum [13]. The concentration of immunoglobulins in bovine milk declines faster after the first days of lactation than human milk [13,14]. Our analysis showed that immunoglobulin A (IgA) was the most abundant immunoglobulin

**Table 2.** Number of protein functions according to GO annotation in human and bovine milk.

| Function                    | Human | Bovine | Common |
|-----------------------------|-------|--------|--------|
| Cell wall/cell adhesion     | 21    | 17     | 8      |
| Coagulation                 | 3     | 7      | 3      |
| Cytoskeleton                | 12    | 8      | 7      |
| Enzymes                     | 70    | 50     | 25     |
| Host defense                | 44    | 51     | 33     |
| Other                       | 18    | 13     | 9      |
| Protease inhibitor          | 12    | 15     | 8      |
| Protein synthesis/chaperone | 11    | 9      | 4      |
| Signaling                   | 15    | 19     | 7      |
| Transport                   | 48    | 64     | 39     |
| Unknown                     | 14    | 16     | 4      |

doi:10.1371/journal.pone.0019433.t002

in human milk (Table 3; gene code: IGHA). In other studies, IgA was also found to be the most prominent immunoglobulin in milk [15,16]. This relatively high IgA concentration in human milk has been linked to the absence of this immunoglobulin in the intestine of the newborn baby [16]. It is also known that already at the age of 4 days, a calf is able to produce IgA in its intestine [17], which probably explains the relatively low IgA concentration in mature bovine milk. The high concentration of polymeric immunoglobulin receptor (PIGR) found in human milk serum (Table 3) can be related to the high IgA concentration, because PIGR is used for the transcytosis of IgA from the basolateral to the apical side of epithelial cells [18].

The newborn human is also known be deficient in CD14, which is part of the Toll-like receptor (TLR)-4 complex [16]. The TLR-4 complex can detect lipopolysaccharides on gram-negative bacteria and subsequently activate the innate immune system. CD14 is, therefore, important for protection against pathogen invasion [16,19]. CD14 has been shown to be present in human milk, with the highest concentration being found in colostrum [19]. Bovine colostrum contains similar amounts of CD14 as human colostrum [19]. Although CD14 was not detected by them in commercial bovine milk [19], we detected CD14 in unprocessed bovine milk serum and MFGM (Table 3). Absence of CD14 in the previous study may be related to heating of their milk, a treatment which we did not apply to our samples.

IgA and CD14 are important proteins for the mucosal immune system [20,21]. Also lactoferrin (LTF) and lysozyme (LYZ) play an important role in the mucosal immune system [20,21]. We found that the concentration of these two antibacterial proteins is much higher in human milk than in bovine milk (Table 3), which is consistent with literature [22]. LTF was relatively abundant in the MFGM fraction of human milk (Table 3), which may seem remarkable for a secreted protein. A previous study, however, found that part of the LTF in human milk was strongly bound to the MFGM membrane [23]. This finding may be related to the defense of the epithelial membrane of the mammary gland, as MFGM originates from the epithelial membrane. Additionally, the membrane-bound LTF may have a host defense function in the newborn. LTF and LYZ have been shown to be more abundant in colostrum than in mature milk for humans and bovines. The differences in their concentration in colostrum of humans and bovines is smaller than between the mature milks [22,24]. The four proteins (IgA, CD14, LTF, and LYZ) described above are all

**Table 1.** Number of total, serum, and milk fat globule membrane (MFGM) proteins in human and bovine milk.

| Proteins | Human | Bovine | Common |
|----------|-------|--------|--------|
| Total    | 268   | 269    | 147    |
| Serum    | 222   | 192    | 105    |
| MFGM     | 234   | 232    | 118    |

doi:10.1371/journal.pone.0019433.t001

**Table 3.** Presence and relative concentration of host defense proteins in human and bovine milk serum and in human and bovine milk fat globule membrane (MFGM).

| Gene code   | Protein                                          | Human serum | Bovine Serum | Human MFGM | Bovine MFGM |
|-------------|--------------------------------------------------|-------------|--------------|------------|-------------|
| A1BG        | Alpha-1B-glycoprotein                            | <1          | <1           | <1         | <1          |
| AGP/ORM1    | Alpha-1-acid glycoprotein                        | <1          | <1           | <1         | 9*          |
| B2M         | Beta-2-microglobulin                             | 94          | 61           | <1         | <1          |
| C3          | Complement component C3                          | 65          | 121          | 12         | 26          |
| C4A         | Complement component C4A                         | 21          | <1           | 12*        | <1          |
| C4BPA       | C4b-binding protein alpha chain                  | ND          | <1           | ND         | <1          |
| C6          | Complement component C6                          | ND          | <1           | ND         | ND          |
| C7          | Complement component C7                          | <1          | <1           | ND         | <1          |
| C9          | Complement component C9                          | ND          | <1           | ND         | <1          |
| CAPG        | Macrophage-capping protein                       | <1          | ND           | ND         | ND          |
| CATHL1      | Cathelicidin-1                                   | ND          | <1           | ND         | 189*        |
| CATHL2      | Cathelicidin-2                                   | ND          | ND           | ND         | 122*        |
| CATHL4      | Cathelicidin-4                                   | ND          | ND           | ND         | 13*         |
| CATHL6      | Cathelicidin-6                                   | ND          | ND           | ND         | 88*         |
| CATHL7      | Cathelicidin-7                                   | ND          | ND           | ND         | <1          |
| CD14        | Monocyte differentiation antigen CD14            | 262*        | 5            | 146*       | 31          |
| CD46        | Membrane cofactor protein precursor              | ND          | <1           | ND         | 15*         |
| CD59        | MAC-inhibitory protein                           | <1          | ND           | 229        | 133         |
| CD81        | CD81 antigen                                     | <1          | <1           | <1         | <1          |
| CD5L        | CD5 antigen-like                                 | ND          | <1           | ND         | <1          |
| CFB         | Complement factor B (Fragment)                   | <1          | <1           | <1         | <1          |
| CFI         | Complement factor I                              | <1          | <1           | <1         | <1          |
| CLU         | Clusterin                                        | 151*        | <1           | 672*       | <1          |
| CRISP3      | Cysteine-rich secretory protein 3                | ND          | 19*          | ND         | <1          |
| CTSS        | Cathepsin S                                      | <1          | ND           | <1         | ND          |
| DCD         | Dermicidin                                       | 102         | 61           | 151*       | <1          |
| DEFA3       | Neutrophil defensin 3                            | ND          | ND           | <1         | ND          |
| ERAP1       | Endoplasmic reticulum aminopeptidase 1           | ND          | <1           | ND         | <1          |
| GLYCAM1     | Glycosylation-dependent cell adhesion molecule 1 | <1          | 3294*        | 11         | 2565*       |
| HF1         | Complement factor H                              | ND          | <1           | ND         | <1          |
| IGHA        | Immunoglobulin alpha chain C region              | 4566*       | <1           | 493*       | <1          |
| IGHG        | Immunoglobulin gamma chain C region              | 127*        | <1           | 112*       | <1          |
| IGJ         | Immunoglobulin J chain                           | 616*        | <1           | <1         | <1          |
| IGK         | Immunoglobulin kappa chain C region              | 1285*       | <1           | <1         | <1          |
| IGKV        | Immunoglobulin kappa chain C region              | <1          | ND           | <1         | ND          |
| IGLC        | Immunoglobulin lambda chain C region             | 115*        | ND           | <1         | ND          |
| IGLV        | Immunoglobulin lambda chain V region             | <1          | ND           | <1         | ND          |
| IGHM        | Immunoglobulin mu chain C region                 | <1          | 220*         | <1         | 214*        |
| LBP         | Lipopolysaccharide-binding protein precursor     | ND          | <1           | ND         | <1          |
| LPO         | Lactoperoxidase                                  | 20          | 161*         | <1         | 10*         |
| LTF         | Lactoferrin                                      | 11182*      | 181          | 7045*      | 59          |
| LYZ         | Lysozyme C                                       | 3274*       | <1           | 674*       | <1          |
| MFGE8       | Milk fat globule-EGF factor 8                    | 31          | 57           | 326        | 2663*       |
| MUC1        | Mucin-1                                          | <1          | <1           | 72         | 181         |
| MUC4        | Mucin-4                                          | <1          | ND           | 70*        | ND          |
| MUC15       | Mucin-15                                         | ND          | <1           | ND         | 213*        |
| MUC16       | Mucin-16                                         | ND          | <1           | ND         | <1          |
| IPI00712983 | Mucin-20-like                                    | ND          | <1           | ND         | <1          |

**Table 3.** Cont.

| Gene code | Protein                                          | Human serum | Bovine Serum | Human MFGM | Bovine MFGM |
|-----------|--------------------------------------------------|-------------|--------------|------------|-------------|
| PIGR      | Polymeric immunoglobulin receptor                | 2745*       | 422          | 215        | 799*        |
| PSME2     | Proteasome activator complex subunit 2           | ND          | ND           | <1         | ND          |
| S100A8    | S100 calcium-binding protein A8 (Calgranulin-A)  | <1          | ND           | <1         | <1          |
| S100A9    | S100 calcium-binding protein A9 (Calgranulin-B)  | ND          | ND           | <1         | <1          |
| S100A12   | S100 calcium-binding protein A12 (Calgranulin-C) | ND          | ND           | ND         | <1          |
| SAA3      | Serum amyloid A protein                          | ND          | ND           | ND         | <1          |
| SCFV      | Single-chain Fv                                  | <1          | ND           | <1         | ND          |
| SERPINA1  | Alpha-1-antitrypsin                              | 31          | 21           | <1         | <1          |
| SERPINA3  | Alpha-1-antichymotrypsin                         | 250*        | <1           | <1         | <1          |
| SERPING1  | Plasma protease C1 inhibitor                     | <1          | <1           | <1         | <1          |
| SPP1      | Osteopontin                                      | 762         | 451          | 42         | 78          |
| TLR2      | Toll-like receptor 2                             | ND          | <1           | 27         | 31          |
| VTN       | Vibronectin                                      | ND          | ND           | <1         | ND          |
| XDH       | Xanthine dehydrogenase/oxidase                   | 282         | 243          | 1084       | 1457        |

Numbers are averaged peak heights of the three most abundant peptides (arbitrary units).

\* significantly higher ( $p < 0.05$ ).

<1: Detected with the qualitative method, but not the quantitative method.

ND: Not detected using either qualitative or quantitative method.

doi:10.1371/journal.pone.0019433.t003

part of the mucosal immune system. The newborn human is deficient in two of them (IgA and CD14) during infancy [16], whereas the calf is not [17]. Although the concentration of these two proteins is similar in bovine and human colostrum [14,19], our data show a higher concentration of these components in mature human milk compared with mature bovine milk. This higher concentration in human milk may be related to differences in maturation of the immune system between babies and calves.

Clusterin is another protein that is more abundant in human milk than in bovine milk. Clusterin, a highly glycosylated protein that is also known as apolipoprotein J, is one of the most abundant proteins in the human MFGM fraction (Table 3). Although its function is not completely clear, clusterin has been linked to cell damage and apoptosis and has been shown to be overexpressed at damaged or stressed tissues and to provide a chaperone-like activity to protect other proteins against damage [8]. Milk fat globule-EGF factor 8 (MFGE8) is a protein that has a similar function as clusterin [25]. Our data shows that MFGE8 is more abundant in bovine milk than in human milk is (Table 3). MFGE8, known also as lactadherin and PAS-6/PAS-7, is a glycoprotein, like clusterin, but its function is not completely clear; however, it has been linked to cell damage and apoptosis [25,26]. It was shown that MFGE8 plays an important role in the maintenance of intestinal epithelial homeostasis and the promotion of mucosal healing [25]. It may be an important milk protein, therefore, for protecting the intestinal tract of the newborn. This protective effect may be related to the finding that MFGE8 is a protein that links to apoptotic cells so they can be recognized by phagocytes for engulfment [26]. This effect on apoptotic cells corresponds to the finding that MFGE8 was upregulated in involuting mammary glands, where they undergo a substantial increase in the rate of epithelial cell apoptosis [27]. The presence of a high concentration of clusterin in human milk and of MFGE8 in bovine milk may thus coincide, because these proteins have a similar function.

Our results also show that bovine milk contains a large amount of glycosylation-dependent cell adhesion molecule 1 (GlyCAM1). This protein is the most abundant host defense protein in bovine

milk serum (Table 3). GlyCAM1, known also as lactophorin and PP3, consists of a diverse group of glycoproteins/glycopeptides. GlyCAM1 is a mucin-like antibacterial component expressed at the membrane of epithelial cells of the mammary gland. The active site of this membrane-bound GlyCAM1, however, is absent in the secreted form of the protein, as found in milk serum or whey [28]. It is possible, therefore, that secreted GlyCAM1 has a different function in milk compared with its function on the epithelial cell membrane [28,29]. The soluble form of MFGE8 has been hypothesized to be involved in lubrication and protection of the intestinal tract and may have an antibacterial function in the intestinal tract [28].

The concentration of antibacterial proteins, mainly of LTF and LYZ, was shown to be higher in human milk [22]. Our analyses revealed, however, that bovine milk contained a wider range of antibacterial proteins (Table 3). The difference in the number of antibacterial proteins was caused by 5 cathelicidins and 3 mucins, which were present only in bovine milk (Table 3). Cathelicidins are antimicrobial proteins found in different tissues of many mammals. The cathelicidin gene (gene code CAMP) has been shown to be expressed in the human mammary gland, and the polypeptide itself has been detected in ducts of the human mammary gland [30,31]; we did, however, not detect the protein in our human milk sample. Cathelicidins have an N-terminal cathelin-like domain, which is conserved between mammals, and a diverse C-terminal antimicrobial domain (Figure 1). This antimicrobial domain differs in both length (12 to 80 residues) and structure between the different cathelicidins [32]. Most of the peptides we identified (Figure 1) were from the cathelin-like domain. Although this domain of the protein is conserved in the different cathelicidins, there are enough differences in the amino acid sequence to discriminate between the cathelicidins. This cathelin-like domain is separated from the antimicrobial domain during the maturation, which is caused by neutrophil elastase [32]. This elastase and cathelicidins are present in polymorphonuclear leukocytes, but in different granules [33,34]. The mature forms of these antimicrobial peptides are found at mucosal surfaces and

**Bovine CATHL1:**  
**METPRASLSLGRWSLWLLLLGLALPSASAQALSYREAVLR/AVDQLNEQSSEPNiYR/LLELDQPPQDDEDPDSPKR/VsFR/VK**  
**ETVCSR/TTQQPPEQCDfKENGLLk/RCeGTVLdQvR/GNFDITcNNHQSIR/ITK/QPWAPPQAA/RLCRiVViRvCr**

**Bovine CATHL2:**  
**METQRASLSLGRCSLWLLLLGLVLPSASAQALSYREAVLR/AVDQFNER/SSEANLYR/LLELDPTPNDDLDPGTR/KPVsFR/V**  
**KETDCPR/TSQQPLEQCDfKENGLVk/QCVGTVTLDPsNDQFDINCNElQSVrFRPPiRRPPiRPPfYPPFRPPiRPPiFPPiRPPf**  
**RPPLGPFGR**

**Bovine CATHL4:**  
**MQTQRASLSLGRWSLWLLLLGLVVPsASAQALSYREAVLR/AVDQLNELSSEANLYR/LLELDPPPKNEDLGRTR/KPVsFTVk/**  
**ETVCPR/TIQPAEQCDfKEK/GRVKQCVGTVTLDPsNDQFDLNCNElQSVilpwKWPWWPwRRG**

**Bovine CATHL6:**  
**METQRASLSLGRWSLWLLLLGLALPSASAQALSYREAVLR/AVDQFNER/SSEANLYR/LLELDPPPKEDDENPNiPKPVsFR/V**  
**KETVCPR/TSQQPAEQCDfKENGLVk/QCVGTVTLDAVK/GKINVTCEELQSVGRfKRFRKKfKfKfKfLKLSPViPLHLG**

**Bovine CATHL7:**  
**METQRASfSLGRSSLWLLLLGLVVPsASAQDLsYREAVLR/AVDQFNER/SSEANLYR/LLELDPPPQDVEHPGAR/KPVsFTV**  
**K/ETVCPRTTPQPEQCDfKENGLVk/QCVGTVTr/ywIRGDFDITcNNiQSAGLfRRLRDSiRRGQQKILEKARRiGERIKDIFRg**

**Human CAMP:**  
**MKTQRDGHSLGRWSLVLLLLGLVMPLAiiAQVLSYKEAVLRaidGINQRSSDANLYRLLDLDPRPTMDGDPDTPKPVsFTVKET**  
**VCPRTTQQSPEDCDfKkDGLVKRCMGTVTLNqARGSFDISCDkdnkRFALLGDFFRKSKEKIGKEFKRiVQRIKDFLrnIVPRtes**

**Figure 1. Overview of the amino acid sequence of the 5 bovine cathelicidins found.** The red-colored amino acids designates the signaling peptide, the green-colored amino acids the cathelin-like domain and the black-colored amino acids the antimicrobial peptide. Bold amino acids are identical in >50% of the sequences, normal capitals show amino acids occurring in multiple sequences ad lower case amino acids occur in only one sequence. The peptides which were identified are underlined, and the yellow marking shows the peptides used for quantification. For comparison, also the amino acid sequence of the human cathelicidin is shown.  
doi:10.1371/journal.pone.0019433.g001

within bodily secretions [35]. The bovine genome contains at least 10 cathelicidin copies, whereas the human genome contains only one [32,36]. The expansions in the cathelicidin gene family in the bovine genome has been hypothesized to be related to increased exposure to bacteria at the epithelial surface of the bovine mammary gland [36].

In addition to these antibacterial proteins, another antibacterial protein is lactoperoxidase (LPO), which is present in higher concentrations in both serum and MFGM of bovine milk than of human milk (Table 3). The primary function of this protein is to catalyze oxidation of certain molecules, using hydrogen peroxide, to generate reactive products with a wide antimicrobial activity [36,37]. LPO is excreted mainly in milk and saliva [36]. The concentration of LPO in bovine milk has been shown to increase significantly in the first 5 days of lactation, reaching a plateau level after 2 weeks [37]. In milk and saliva, the main component known to be oxidized is the thiocyanate ion (SCN<sup>-</sup>) [36,37]. The diet of the cow consists mainly of plant materials and is a good source of SCN<sup>-</sup> [38]. This SCN<sup>-</sup> can be converted by LPO into hypothiocyanate (SCNO<sup>-</sup>), which is a potent inhibitor of bacterial growth [37,38]. In human milk, however, the limiting factor for LPO activity is its low SCN<sup>-</sup> concentration [39]. The higher concentration of LPO in bovine milk, compared with human milk, may be related, therefore, to differences in SCN<sup>-</sup> availability in the diet of the cow compared with the diet of human.

In summary, results demonstrate our ability to detect a wide range of proteins, including those from the host defense system, in human and bovine milk. Qualitative and quantitative differences were found in the milk of these two mammals. A number of antimicrobial proteins (cathelicidins, lactoperoxidase) were more abundant in bovine milk. The high concentration of lactoperoxidase is probably linked to the high amount of thiocyanate in the plant-based diet of cows. Higher concentrations of four proteins

involved in the mucosal defense system (IgA, CD14, LTF, and LYZ) were found in human milk than in bovine milk. It is known that the newborn baby is deficient for two of these proteins, i.e. IgA and CD14. The concentrations of these four proteins, which are relatively similar in human and bovine colostrum, are higher in mature human milk compared to mature bovine milk. These differences in concentration between species may be related to differences in the development of the immune system of babies and calves. These results may, therefore, indicate a slower maturation of the immune system in babies than in calves. This first detailed analysis of host defense proteins in human and bovine milk is an important step in understanding the function of milk in these two mammals.

**Materials and Methods**

The different steps involved in our analysis are described in this section. Figure 2 gives an overview of the experimental procedure. Milk samples were donated anonymously for this study and pooled before use, so IRB approval was not required. The regulations on which the exemption is based are 1. The ‘‘Law on medical-scientific research/Wet medisch-wetenschappelijk onderzoek’’ and 2. the ‘‘Code Good Practice/Code Goed Gebruik’’ of the ‘‘Dutch federation of Biomedical Scientific Societies’’.

**Pooled milk samples**

Human milk was collected from 10 healthy mothers between 3 and 10 months in lactation. Samples of 10 mL were collected and frozen for later analysis. Milk samples were donated anonymously for this study and pooled before use, so IRB approval was not required. After thawing, the 10 samples were pooled and protein fractions were separated (see below). One bovine tank milk sample was collected from the university farm ‘‘De Ossekampen’’ in

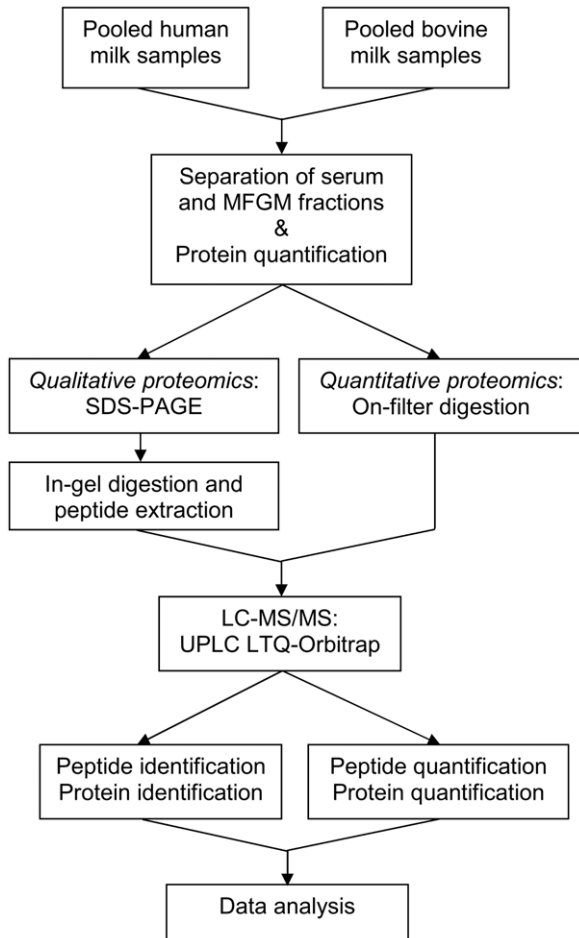

**Figure 2. Overview of the experimental procedure.**  
doi:10.1371/journal.pone.0019433.g002

Wageningen, The Netherlands, which was milk from 30 clinically healthy cows which were between 3 weeks and 10 months in lactation.

### Separation of milk serum and MFGM protein fractions

The separation of the serum and MFGM proteins was done as described by [5]. Milk samples were centrifuged at 1500 g for 20 min at 4°C. The cream was used for MFGM protein isolation. 5 mL of the skimmed milk was centrifuged for 90 min at 100,000 g to pellet the casein; the resulting supernatant, containing the serum proteins, was frozen at -45°C. The cream (about 10 mL) was washed 4 times by careful shaking with 30 mL phosphate-buffered saline followed by centrifugation. The washed cream was mixed 1:1 (vol) with Milli-Q water, sonificated for 2 min, and centrifuged to remove fat. The watery subnatant, containing the MFGM proteins, was frozen at -45°C.

### Protein quantification

The protein content of all samples was quantified using a BSA Protein Assay kit (Thermo, San Jose, CA, USA). The results from these analyses were used to load the same amount of protein per fraction on the SDS-PAGE gel or centrifugal filter device.

### SDS-PAGE

Pre-cast 12% Precise Protein Gels were used with HEPES buffer (Thermo, San Jose, CA, USA). The thawed protein samples

were mixed 1:1 (vol) with 2x sample buffer (125 mM Tris-HCl (pH 6.8), 4% SDS, 20% glycerol, and 0.01% bromophenol blue in Milli-Q water; just before use, 5%  $\beta$ -mercaptoethanol was added) and heated for 5 min at 95°C. The protein load on the gel was about 30  $\mu$ g of protein per well. The gel was run for 45 min at 130 Volt. The proteins were stained for 4 h using the Colloidal Blue Staining Kit (LC6025, Invitrogen, Carlsbad, CA, USA), and destained overnight in Milli-Q water.

### Qualitative proteomics

Except when stated otherwise, all solutions were prepared in 50 mM  $\text{NH}_4\text{HCO}_3$  (pH 8). After each step, samples were sonicated for 1 min followed by spin down using a centrifuge. For each sample put on the SDS-PAGE gel, the gel lane was cut in 8 slices of about equal size. Each slice was cut into <1 mm<sup>3</sup> pieces and transferred to low-binding microcentrifuge tubes (0030 108.094, Eppendorf, Hamburg, Germany). The gel pieces were washed twice with water. The proteins were reduced by incubation in 50 mM dithiothreitol for 1 h at 60°C followed by incubation in 100 mM iodoacetamide for 1 h at room temperature in the dark. After reduction, the gel pieces were washed 3 times with 50 mM  $\text{NH}_4\text{HCO}_3$ . Sample were then frozen and thawed 3 times to increase the accessibility for trypsin. 20  $\mu$ L of freshly prepared trypsin solution (10 ng/ $\mu$ L) was added to the gel pieces. Extra 50 mM  $\text{NH}_4\text{HCO}_3$  was added to cover the gel pieces completely. The gel pieces were incubated overnight at room temperature. After trypsin digestion, the supernatant was transferred to a clean low-binding microcentrifuge tube (Eppendorf). 10  $\mu$ L 5% trifluoroacetic acid (TFA) in water was added to the gel pieces, and after sonication the acidic supernatant was added to the same microcentrifuge tube. 10  $\mu$ L 10% acetonitrile/1% TFA was then added to the gel pieces, and after sonication the supernatant was added to the same microcentrifuge tube. The pH of the final peptide mixture was verified to be about 2, using pH paper.

### Quantitative proteomics

The previously prepared milk serum and MFGM protein fractions were analyzed in fivefold using an adapted version of [40]. 20  $\mu$ L of protein solution, containing about 25  $\mu$ g of protein, was solubilized in 180  $\mu$ L of Solution A (100 mM Tris/HCl (pH 7.6) containing 4% SDS and 0.1 M DTT). Samples were heated for 5 min at 95°C. After cooling each sample to room temperature, 10  $\mu$ L was loaded on a filter-containing centrifugal device (10–20 kDa cutoff, OD003C34; Pall, Washington, NY, USA) and centrifuged at 20,000 g for 1 min. 100  $\mu$ L of Solution B (8 M Urea in 100 mM Tris/HCl pH 8) was added and the device was centrifuged for 30 min at 20,000 g. 100  $\mu$ L of Solution C (0.05 M iodoacetamide in Solution B) was added. The device was mixed for 1 min, followed by incubation for 10 min. The device was then centrifuged for 30 minutes at 20,000 g. Three wash steps, with 110, 120 and 130  $\mu$ L respectively, of Solution B were performed with centrifugation for 30 min at 20,000 g after each wash step. 140  $\mu$ L of solution D (0.05 M  $\text{NH}_4\text{HCO}_3$ ) was added followed by centrifugation at 20,000 g for 30 min. The filter unit was then transferred to a low-binding microcentrifuge tube (Eppendorf) and 1  $\mu$ L sequencing-grade trypsin (Roche, Penzberg, Germany) in Solution D (total volume 100  $\mu$ L) was added to the filter. The filters were incubated overnight at room temperature. Filters were then centrifuged for 30 min at 20,000 g. Finally, 3.5  $\mu$ L 10% TFA in water was added. The pH of the final peptide mixture was verified to be about 2, using pH paper.

### LC-MS/MS

Samples were analyzed by injecting 18  $\mu$ L of sample over a 0.1032 mm Prontosil 300-3-C18H (Bischoff, Germany) pre-

concentration column (prepared in house) at a maximum pressure of 270 bar. Peptides were eluted from the pre-concentration column onto a 0.10200 mm Prontosil 300-3-C18H analytical column with an acetonitrile gradient at a flow of 0.5  $\mu$ L/min. The gradient consisted of an increase from 9% to 34% acetonitrile in water with 1 mL/L formic acid in 50 min, followed by an increase in the percentage acetonitrile to 80% (with 20% water and 1 mL/L formic acid in the acetonitrile and the water) in 3 min, as a column-cleaning step. Between the pre-concentration and analytical columns, an electrospray potential of 3.5 kV was applied directly to the eluent via a solid 0.5 mm platinum electrode fitted into a P777 Upchurch microcross. Full scan positive mode FTMS spectra were measured between m/z 380 and 1400 on a LTQ-Orbitrap (Thermo electron, San Jose, CA, USA). MSMS scans of the four most abundant doubly- and triply-charged peaks in the FTMS scan were recorded in data-dependent mode in the linear trap (MSMS threshold = 5.000).

### Peptide and protein identification

Each run with all MSMS spectra obtained was analyzed with Bioworks 3.3.1 (Thermo electron, San Jose, CA, USA). A maximum of totally 1 differential modification per peptide was set for oxidation of methionines and de-amidation of N and Q. Carboxamidomethylation of cysteines was set as a fixed modification (enzyme = trypsin, maximally 2 missed cleavages, peptide tolerance 10 ppm, fragment ions tolerance 0.5 amu).

A combined protein database was constructed from the human and bovine IPI databases (downloaded as fasta files from ftp.ebi.ac.uk/pub/databases/IPI/current accessed August 2009). A set of 31 protein sequences of common contaminants was added including Trypsin (P00760, bovin), Trypsin (P00761, porcin), Keratin K22E (P35908, human), Keratin K1C9 (P35527, human), Keratin K2C1 (P04264, human), and Keratin K1CI (P35527, human). A decoy database was created by adding the reversed sequences using SequenceReverser from the MaxQuant package [41]. These steps gave a database containing 242906 proteins in total.

### References

- German JB, Dillard CJ, Ward RE (2002) Bioactive components in milk. *Curr Opin Clin Nutr Metab Care* 5: 653–658.
- Severin S, Wenshui X (2005) Milk biologically active components as nutraceuticals: review. *Crit Rev Food Sci Nutr* 45: 645–656.
- Newburg DS (2001) Bioactive components of human milk: evolution, efficiency, and protection. *Adv Exp Med Biol* 501: 3–10.
- D'Allesandro A, Scaloni A, Zolla L (2010) Human milk proteins: and interactions and updated functional overview. *J Proteome Res* 9: 3339–3373.
- Smolenski G, Haines S, Kwan FY, Bond J, Farr V, et al. (2007) Characterisation of host defence proteins in milk using a proteomic approach. *J Proteome Res* 6: 207–215.
- Affolter M, Grass L, Vanrobaeys F, Casado B, Kussmann M (2010) Qualitative and quantitative profiling of the bovine milk fat globule membrane proteome. *J Proteomics* 73: 1079–1088.
- Heid HW, Keenan TW (2005) Intracellular origin and secretion of milk fat globules. *Eur J Cell Biol* 84: 245–258.
- Charlwood J, Hanrahan S, Tyldesley R, Langridge J, Dwek M, et al. (2002) Use of Proteomic Methodology for the Characterization of Human Milk Fat Globular Membrane Proteins. *Anal Biochem* 301: 314–324.
- Fortunato D, Giuffrida MG, Cavaletto M, Garoffo LP, Dellavalle G, et al. (2003) Structural proteome of human colostrum fat globule membrane proteins. *Proteomics* 3: 897–905.
- Reinhardt TA, Lippolis JD (2006) Bovine milk fat globule membrane proteome. *J Dairy Res* 73: 406–416.
- D'Amato A, Bachi A, Fasoli E, Boschetti E, Pelre G, et al. (2009) In-depth exploration of cow's whey proteome via combinatorial peptide ligand libraries. *J Proteome Res* 8: 3925–3936.
- Reinhardt TA, Lippolis JD (2008) Developmental changes in the milk fat globule membrane proteome during the transition from colostrum to milk. *J Dairy Sci* 91: 2307–2318.
- Korhonen H, Marnila P, Gill HS (2000) Milk immunoglobulins and complement factors. *Br J Nutr* 84: S75–S80.
- Porter P (1972) Immunoglobulins in Bovine Mammary Secretions - Quantitative changes in early lactation and absorption by the neonatal calf. *Immunology* 23: 225–238.
- Shah NP (2000) Effects of milk-derived bioactives: an overview. *Br J Nutr* 84: S3–S10.
- Walker A (2010) Breast milk as the gold standard for protective nutrients. *J Pediatr* 156: S3–S7.
- Allen WD, Porter P (1975) Localization of immunoglobulins in intestinal mucosa and the production of secretory antibodies in response to intraluminal administration of bacterial antigens in the preruminant calf. *Clin Exp Immunol* 21: 407–418.
- Kaetzel CS (2005) The polymeric immunoglobulin receptor: bridging innate and adaptive immune responses at mucosal surfaces. *Immunol Rev* 206: 83–99.
- Labeta MO, Vidal K, Mors JE (2002) Innate recognition of bacteria in human milk is mediated by a milk-derived highly expressed pattern recognition receptor, soluble CD14. *J Exp Med* 191: 1807–1812.
- Kovar MG, Serdula MK, Marks JS, Fraser DW (1984) Review of the epidemiological evidence for an association between infant feeding and infant health. *Pediatric* 74: 615–638.
- Sanderson IR, Walker WA (1999) Development of the gastrointestinal tract. Chapter 14. Blackwell Science, Oxford, UK.
- Fox PF, McSweeney PLH (2003) Advanced dairy chemistry. Volume 1: proteins, 3<sup>rd</sup> edition. Chapter 12.4. Kluwer academic plenum publishers. New York, NY, USA.
- Cho JK, Azuma N, Lee CH, Yu JH, Kanno C (2000) Purification of membrane-bound lactoferrin from the human milk fat globule membrane. *Biosci Biotechnol Biochem* 64: 633–635.
- Walstra P, Wouters JTM, Geurts TJ (2005) Dairy Science and Technology. 2<sup>nd</sup> edition. Chapters 2.7 and 16.6. CRC Press. Boca Raton, FL, USA.
- Bu HF, Zuo XL, Wang X, Ensslin MA, Koti V, et al. (2007) Milk fat globule-EGF factor 8/lactadherin plays a crucial role in maintenance and repair of murine intestinal epithelium. *J Clin Invest* 117: 3673–3683.

### Protein quantification

The peptide identifications obtained were filtered in Bioworks with four filter criteria:  $\Delta$ Cn >0.08, Xcorr >1.5 for charge state 2+, Xcorr >3.3 for charge state 3+, and Xcorr >3.5 for charge state 4+ [42]. Finally, proteins were displayed based on minimally 2 distinct peptides, an Sf score >1, and a probability <0.5. The false discovery rate (the number of hits against the inverted decoy proteins within filter settings divided by the total number of proteins within filter settings times 100%) was 0%. The function of the identified proteins was checked in the UniProtKB database (<http://www.uniprot.org/> accessed November 2009).

Peak height of peptides belonging to an identified protein was determined using Bioworks. For the host defense proteins, the 3 most abundant peptides per protein were summed [43]. The same 3 peptides were chosen for the five replicates. The summed peptide heights were compared between the human and bovine samples using an independent two-sample t-test, using PASW statistics 17 (SPSS Inc, Chicago, IL, USA). If a protein was not detected in a specific sample, the value for the peak height was set to  $10^4$  (minimum detection level) for statistical calculations and “<1” in Table 3.

### Acknowledgments

We would like to thank the mothers who donated milk for this research as well as the hospital “Gelderse Vallei Ede” for their help in obtaining the human milk samples. We would also like to thank Michael Grossman for his editorial comments on the manuscript.

### Author Contributions

Conceived and designed the experiments: KH HvV SdV TvH JvA JV. Performed the experiments: KH SB JV. Analyzed the data: KH HvV SdV SB JV. Contributed reagents/materials/analysis tools: SB SdV JV. Wrote the paper: KH HvV SdV SB TvH JvA JV.

26. Hanayama R, Tanaka M, Miwa K, Shinohara A, Iwamatsu A, et al. (2002) Identification of a factor that links apoptotic cells to phagocytes. *Nature* 417: 182–187.
27. Nakatani H, Aoki N, Nakagawa Y, Jin-No S, Aoyama K, et al. (2006) Weaning-induced expression of a milk-fat globule protein, MFG-E8, in mouse mammary glands, as demonstrated by the analyses of its mRNA, protein and phosphatidylserine-binding activity. *Biochem J* 395: 21–30.
28. Dowbenko D, Kikuta A, Fennie C, Gillett N, Lasky LA (1993) Glycosylation-dependent cell adhesion molecule 1 (GlyCAM 1) mucin is expressed by lactating mammary gland epithelial cells and is present in milk. *J Clin Invest* 92: 952–960.
29. Hou Z, Bailey JP, Vomachka AJ, Matsuda M, Lockefer JA, et al. (2000) Glycosylation-Dependent Cell Adhesion Molecule 1 (GlyCAM 1) Is Induced by Prolactin and Suppressed by Progesterone in Mammary Epithelium. *Endocrinol* 141: 4278–4283.
30. Armogida SA, Yannaras NM, Melton AL, Srivastava MD (2004) Identification and quantification of innate immune system mediators in human breast milk. *Allergy Asthma Proc* 25: 297–304.
31. Murakami M, Dorschner RA, Stern LJ, Lin KH, Gallo RL (2005) Expression and secretion of cathelicidin antimicrobial peptides in murine mammary glands and human milk. *Pediatr Res* 57: 10–15.
32. Oppenheim JJ, Yang D (2005) Alarmins: chemotactic activators of immune responses. *Curr Opin Immunol* 17: 359–365.
33. Zanetti M, Gennaro R, Romeo D (1995) Cathelicidins: a novel protein family with a common proregion and a variable C-terminal antimicrobial domain. *FEBS Lett* 374: 1–5.
34. Gillenwaters EN, Seabury CM, Elliott JS, Womack JE (2009) Sequence analysis and polymorphism discovery in 4 members of the bovine cathelicidin gene family. *J Hered* 100: 241–245.
35. Mookherjee N, Wilson HL, Doria S, Popowych Y, Falsafi R, et al. (2006) Bovine and human cathelicidin cationic host defense peptides similarly suppress transcriptional responses to bacterial lipopolysaccharide. *J Leukoc Biol* 80: 1563–1574.
36. Lemay DG, Lynn DJ, Martin WF, Neville MC, Casey TM, et al. (2009) The bovine lactation genome: insights into the evolution of mammalian milk. *Genome Biol* 10: R43.
37. Kussendrager KD, van Hooijdonk ACM (2000) Lactoperoxidase: physicochemical properties, occurrence, mechanism of action and applications. *Br J Nutr* 84: S19–25.
38. Fonteh FA, Grandison AS, Lewis MJ (2002) Variations of lactoperoxidase activity and thiocyanate content in cows' and goats' milk throughout lactation. *J Dairy Res* 69: 401–409.
39. Russell MW, Bobek LA, Brock JH, Hajishengallis G, Tenovuo J (2005) *Mucosal Immunology*. Third Edition. Mestecky J, Lamm ME, McGhee JR, Bienenstock J, Mayer L, Strober W, eds. Chapter 5: Innate humoral defense factors. London, UK: Academic Press.
40. Wiśniewski JR, Zougman A, Nagaraj N, Mann M (2009) Universal sample preparation method for proteome analysis. *Nat Methods* 6: 359–362.
41. Cox J, Mann M (2008) MaxQuant enables high peptide identification rates, individualized p.p.b.-range mass accuracies and proteome-wide protein quantification. *Nat Biotechnol* 26: 1367–1372.
42. Peng JM, Elias JE, Thoreen CC, Licklider LJ, Gygi SP (2003) Evaluation of multidimensional chromatography coupled with tandem mass spectrometry (LC/LC-MS/MS) for large-scale protein analysis: The yeast proteome. *J Proteome Res* 2: 43–50.
43. Silva JC, Gorenstein MV, Li GZ, Vissers JPC, Geromanos SJ (2006) Absolute quantification of proteins by LCMSE - A virtue of parallel MS acquisition. *Mol Cell Proteomics* 5: 144–156.
